# Supplementary material for: Performance Study of Zn-Co-Ni/AC Catalyst in Acetylene Acetylation
Source: MDPI journal article supplement (doi:10.3390/catal11111271), 2021-10-22
Supplement: s1 [file s1]

Archive with 1 entries (1 files):
- catalysts-1435282-supplementary.pdf
